# Supplementary material for: Effect of postmastectomy radiotherapy on triple-negative breast cancer with T1-2 and 1-3 positive axillary lymph nodes: a population-based study using the SEER 18 database
Source: PubMed Central journal article supplement (PMC6718267; doi:10.18632/oncotarget.24703), 2019-08-27
Supplement: oncotarget-10-5245-s001.pdf [file oncotarget-10-5245-s001.pdf]

## Effect of postmastectomy radiotherapy on triple-negative breast cancer with T1-2 and 1-3 positive axillary lymph nodes: a population-based study using the SEER 18 database

### SUPPLEMENTARY MATERIALS

Supplementary Table 1: Univariate Cox proportional hazard model for the outcome-related factors

| Variable                    | OS    |             |                | BCSS  |             |                |
|-----------------------------|-------|-------------|----------------|-------|-------------|----------------|
|                             | HR    | 95%CI       | P <sup>c</sup> | HR    | 95%CI       | P <sup>c</sup> |
| <b>Age (years)</b>          |       |             |                |       |             |                |
| ≥50                         | 1     |             |                | 1     |             |                |
| <50                         | 0.822 | 0.585-1.155 | 0.259          | 0.818 | 0.567-1.182 | 0.285          |
| <b>Race</b>                 |       |             |                |       |             |                |
| White                       | 1     |             |                | 1     |             |                |
| Black                       | 1.226 | 0.823-1.824 | 0.316          | 1.216 | 0.789-1.874 | 0.376          |
| Other <sup>a</sup>          | 0.578 | 0.253-1.316 | 0.191          | 0.681 | 0.297-1.557 | 0.362          |
| <b>Marital status</b>       |       |             |                |       |             |                |
| Married                     | 1     |             |                | 1     |             |                |
| Not married <sup>b</sup>    | 1.559 | 1.117-2.174 | <b>0.009</b>   | 1.484 | 1.035-2.127 | <b>0.032</b>   |
| <b>Grade</b>                |       |             |                |       |             |                |
| III                         | 1     |             |                | 1     |             |                |
| I/II                        | 1.077 | 0.640-1.814 | 0.779          | 1.108 | 0.634-1.936 | 0.718          |
| <b>Stage T</b>              |       |             |                |       |             |                |
| T2                          | 1     |             |                | 1     |             |                |
| T1                          | 0.617 | 0.416-0.917 | <b>0.017</b>   | 0.548 | 0.353-0.852 | <b>0.008</b>   |
| <b>Number of lymph node</b> |       |             |                |       |             |                |
| 1                           | 1     |             |                | 1     |             |                |
| 2                           | 1.095 | 0.750-1.598 | 0.639          | 1.040 | 0.691-1.565 | 0.851          |
| 3                           | 1.138 | 0.725-1.787 | 0.575          | 1.037 | 0.632-1.704 | 0.884          |
| <b>Chemotherapy</b>         |       |             |                |       |             |                |
| Yes                         | 1     |             |                | 1     |             |                |
| No                          | 1.136 | 0.707-1.825 | 0.597          | 0.902 | 0.516-1.575 | 0.717          |
| <b>Radiotherapy</b>         |       |             |                |       |             |                |
| No                          | 1     |             |                | 1     |             |                |
| Yes                         | 0.692 | 0.491-0.974 | <b>0.035</b>   | 0.707 | 0.489-1.022 | 0.066          |

Abbreviation: CI, confidence interval.

<sup>a</sup> Other includes American Indian/Alaskan native, and Asian/Pacific Islander.

<sup>b</sup> Not married includes divorced, separated, single (never married), unmarried or domestic partner and widowed.

<sup>c</sup> P value was calculated by a univariate Cox proportional hazard regression model including all factors, and a bold type indicates significance.
